# Supplementary material for: Regulated internalization of NMDA receptors drives PKD1-mediated suppression of the activity of residual cell-surface NMDA receptors
Source: PubMed Central journal article supplement (PMC4653853; doi:10.1186/s13041-015-0167-1), 2015-11-19

**A**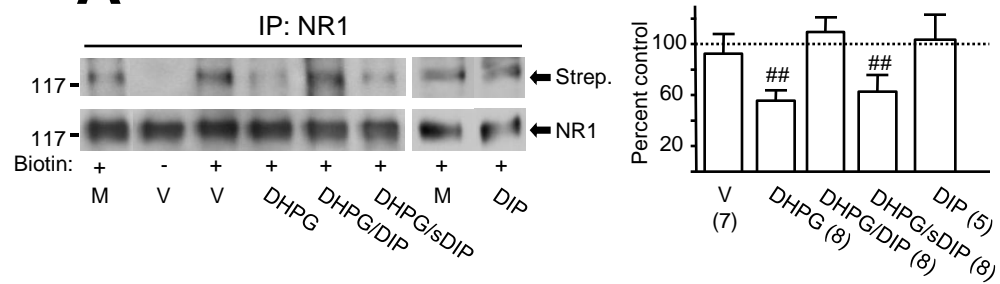**B**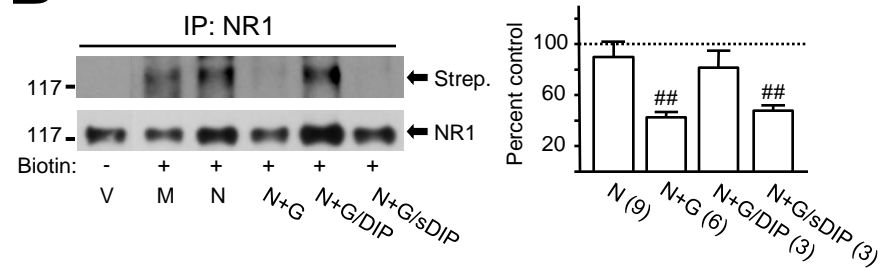

Supplement: 13041_2015_167_MOESM1_ESM.pdf [file 13041_2015_167_MOESM1_ESM.pdf]
