# Supplementary material for: Regulated internalization of NMDA receptors drives PKD1-mediated suppression of the activity of residual cell-surface NMDA receptors
Source: PubMed Central journal article supplement (PMC4653853; doi:10.1186/s13041-015-0167-1), 2015-11-19

**A**

NR1-1a/NR2A

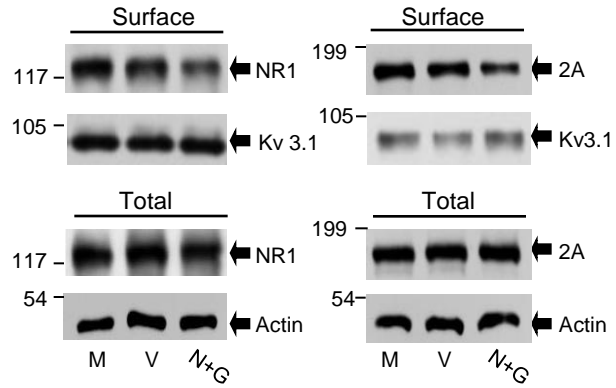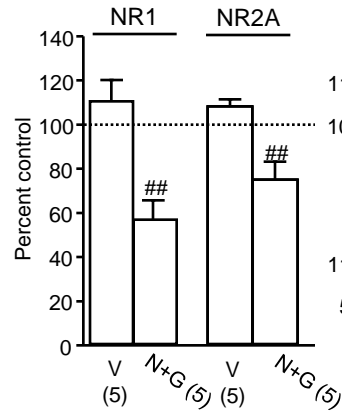**B**

NR1-1a/NR2B

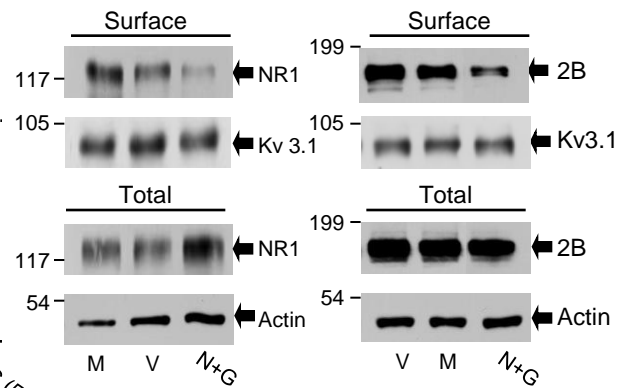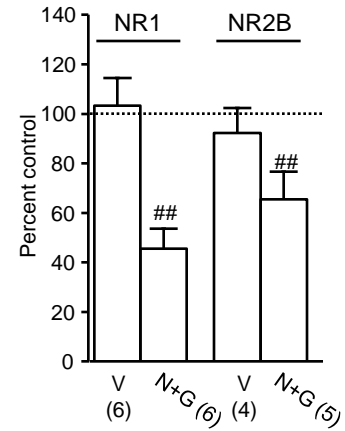**C**

NR1-1a/NR2A1-857

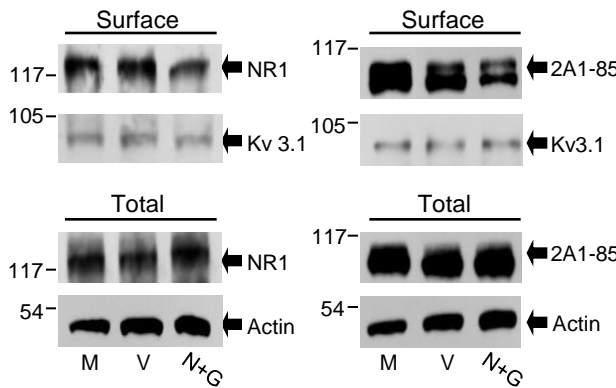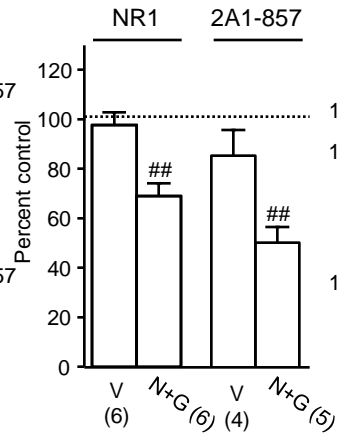**D**

NR1-1a/NR2B1-857

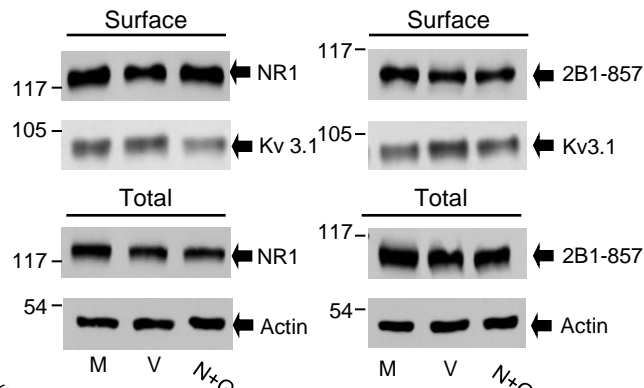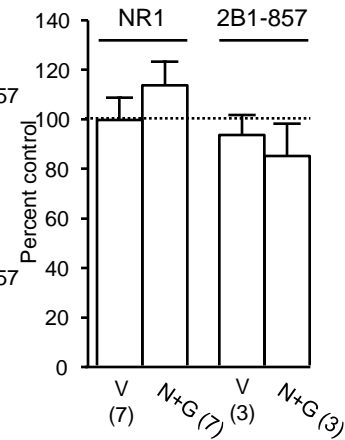

Supplement: 13041_2015_167_MOESM3_ESM.pdf [file 13041_2015_167_MOESM3_ESM.pdf]
